# Supplementary material for: Phenotype, donor age and gender affect function of human bone marrow-derived mesenchymal stromal cells
Source: PubMed Central journal article supplement (PMC3694028; doi:10.1186/1741-7015-11-146), 2013-06-11
Supplement: 1741-7015-11-146-S1.pdf [file 1741-7015-11-146-S1.pdf]

**Supplemental Figure 4**  
Flow cytometry gating strategy

**G1**

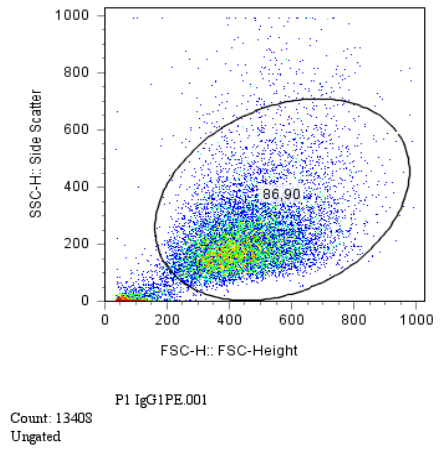

FSC-SSC gating to separate debris from intact cells (G1).

**G2**

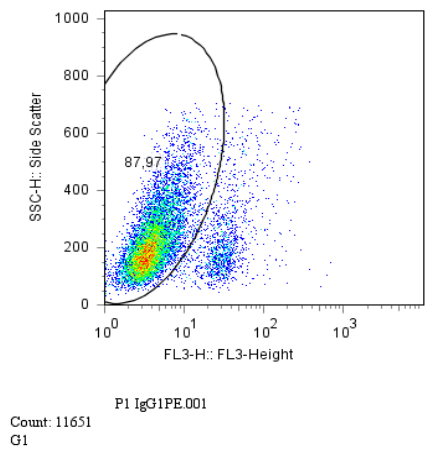

Exclusion of dead cells by uptake of 7-AAD (G2 on 7-AAD negative [= live] cells).

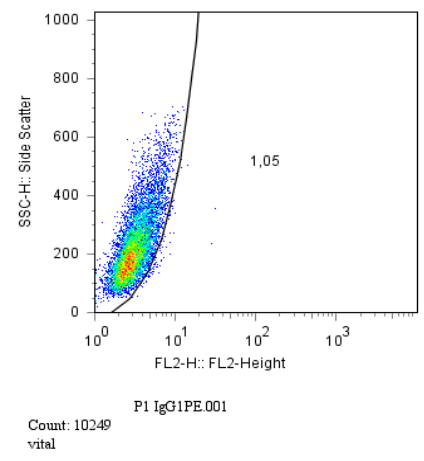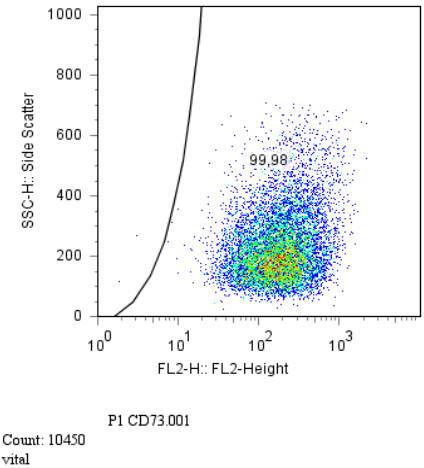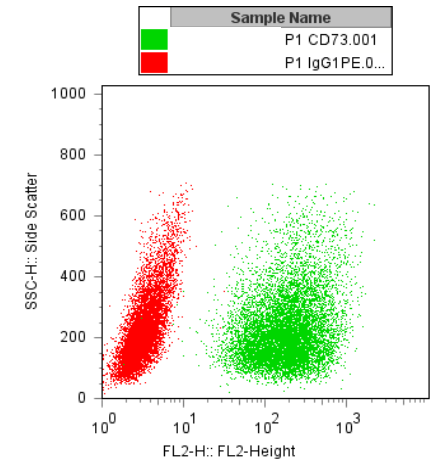

Analysis of percentage of antigen positive cells and fluorescence intensity. For compensation of unspecific antibody binding, the positivity of the respective matched isotype control was subtracted from all samples.
