# Supplementary material for: Phenotype, donor age and gender affect function of human bone marrow-derived mesenchymal stromal cells
Source: PubMed Central journal article supplement (PMC3694028; doi:10.1186/1741-7015-11-146), 2013-06-11
Supplement: 1741-7015-11-146-S2.pdf [file 1741-7015-11-146-S2.pdf]

# Supplemental Figure 5

## Flow cytometry density plots

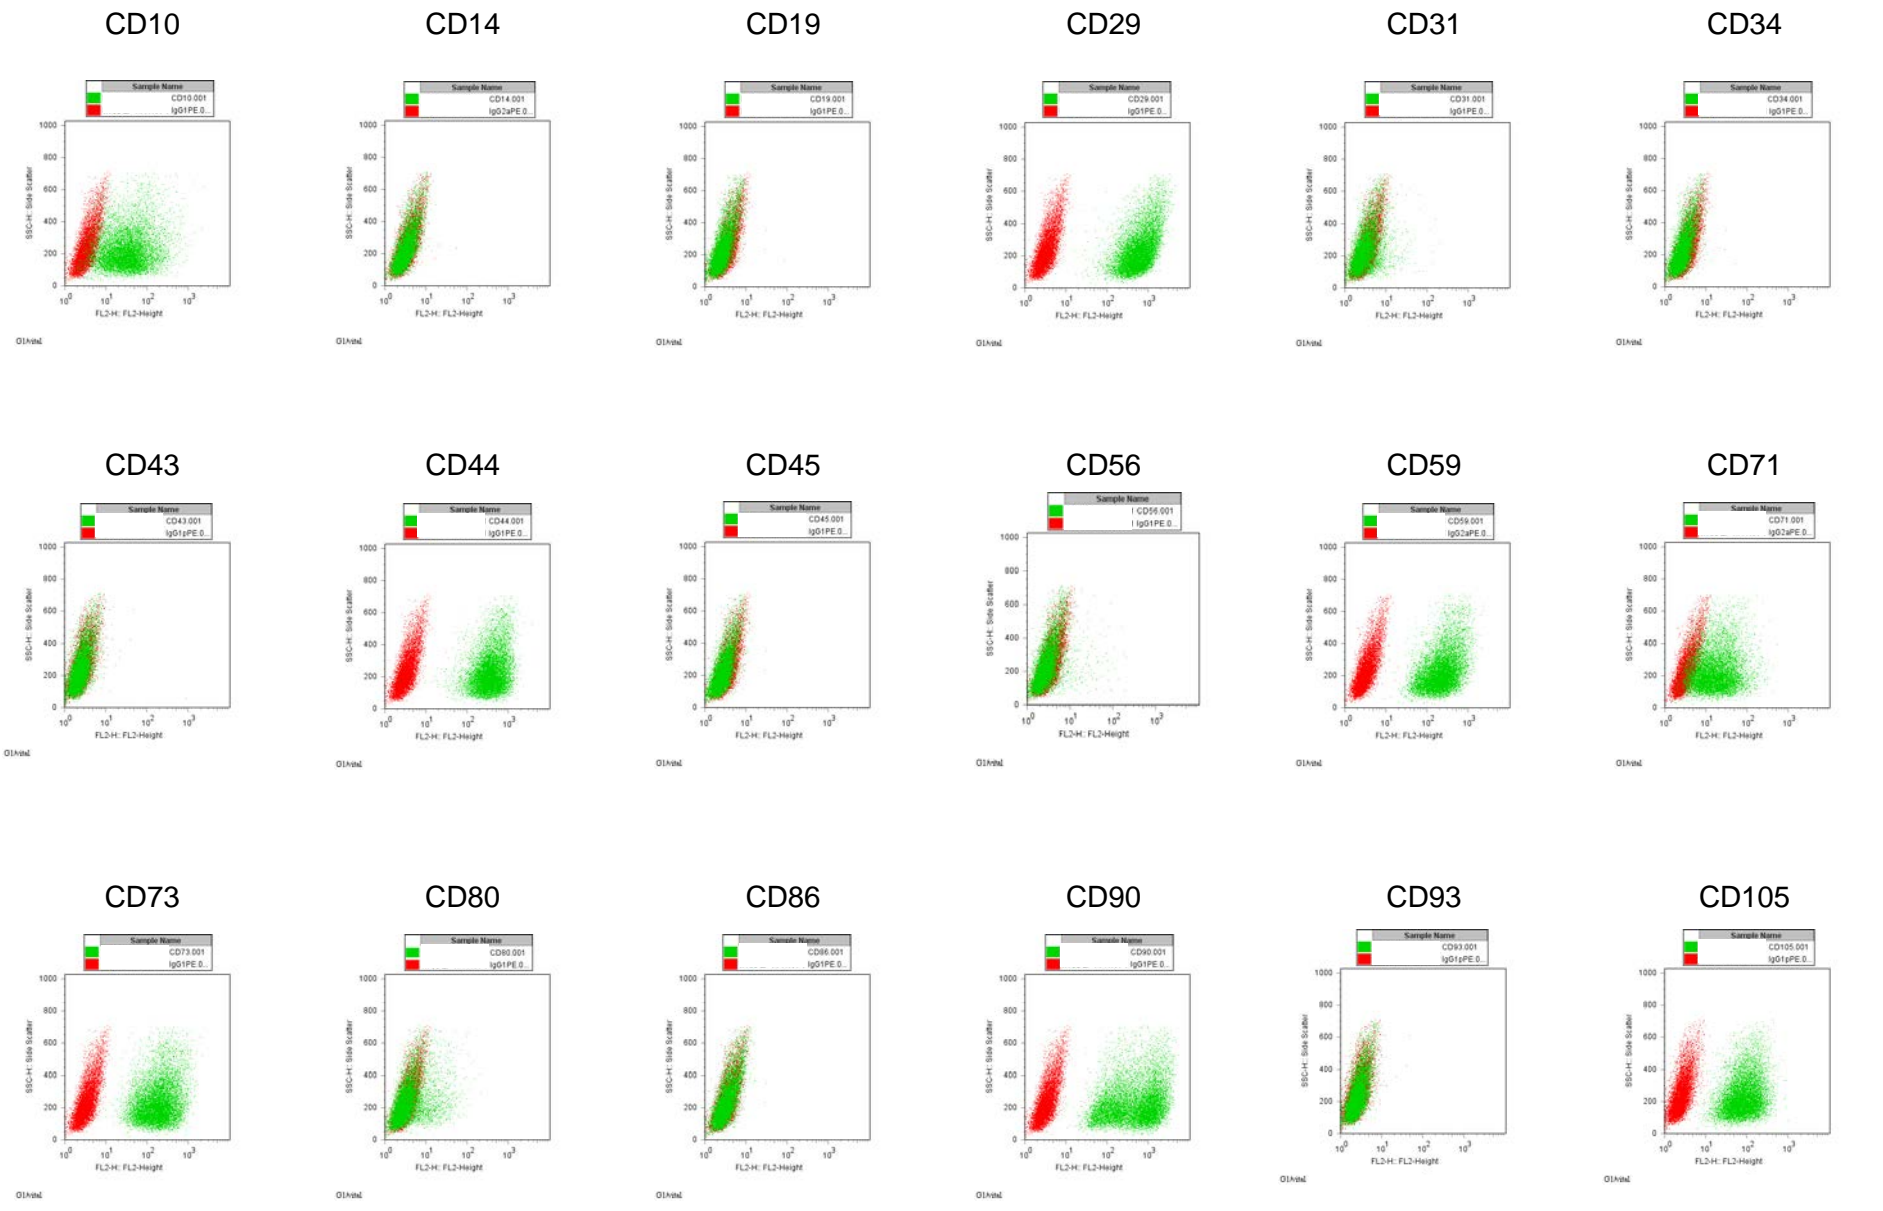

CD10

CD14

CD19

CD29

CD31

CD34

CD43

CD44

CD45

CD56

CD59

CD71

CD73

CD80

CD86

CD90

CD93

CD105

CD106

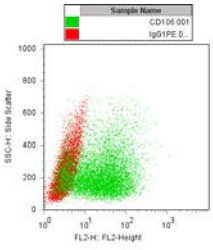

D19b6

CD117

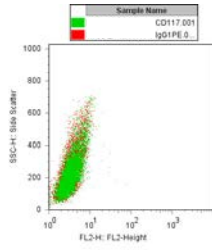

D19b6

CD119

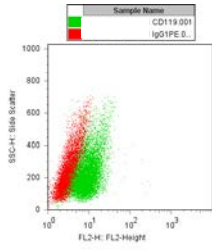

D19b6

CD130

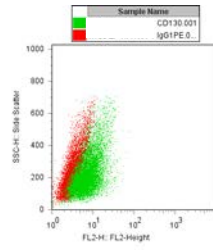

D19b6

CD133

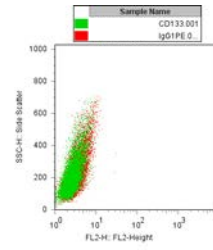

D19b6

CD140a

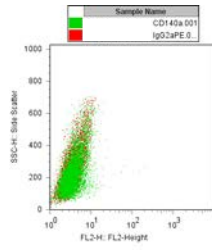

D19b6

CD140b

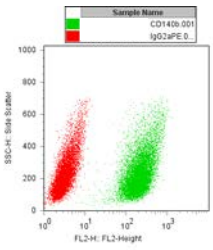

D19b6

CD146

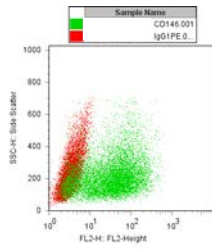

D19b6

CD166

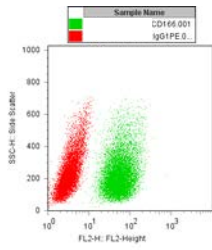

D19b6

CD173

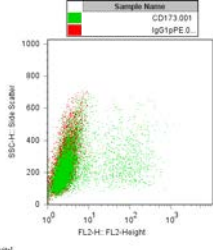

D19b6

CD243

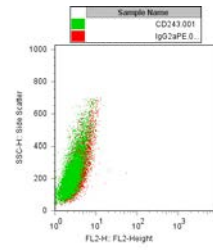

D19b6

CD271

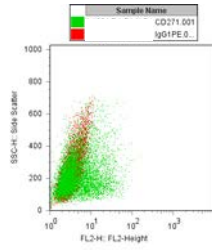

D19b6

CD273

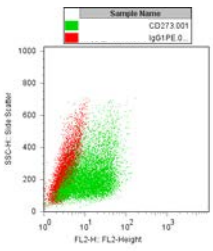

D19b6

CD274

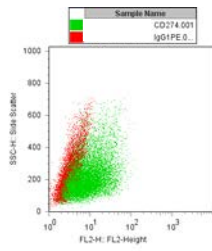

D19b6

Galectin 1

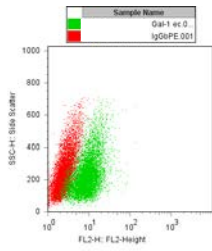

D19b6

GD2

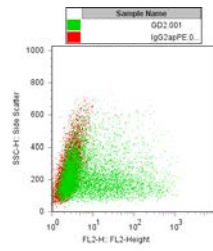

D19b6

HLA ABC

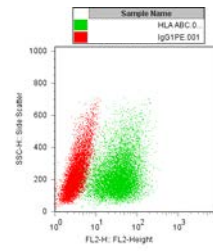

D19b6

HLA G

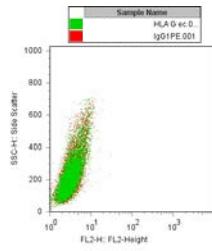

D19b6

### SSEA-1

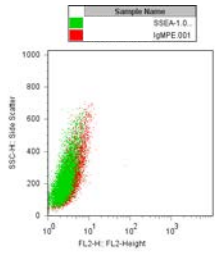

01N04

### SSEA-4

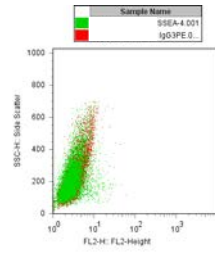

01N04

### W8B2

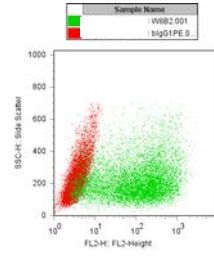

01N04
