# Supplementary material for: Phenotype, donor age and gender affect function of human bone marrow-derived mesenchymal stromal cells
Source: PubMed Central journal article supplement (PMC3694028; doi:10.1186/1741-7015-11-146), 2013-06-11

Supplemental Figure 1

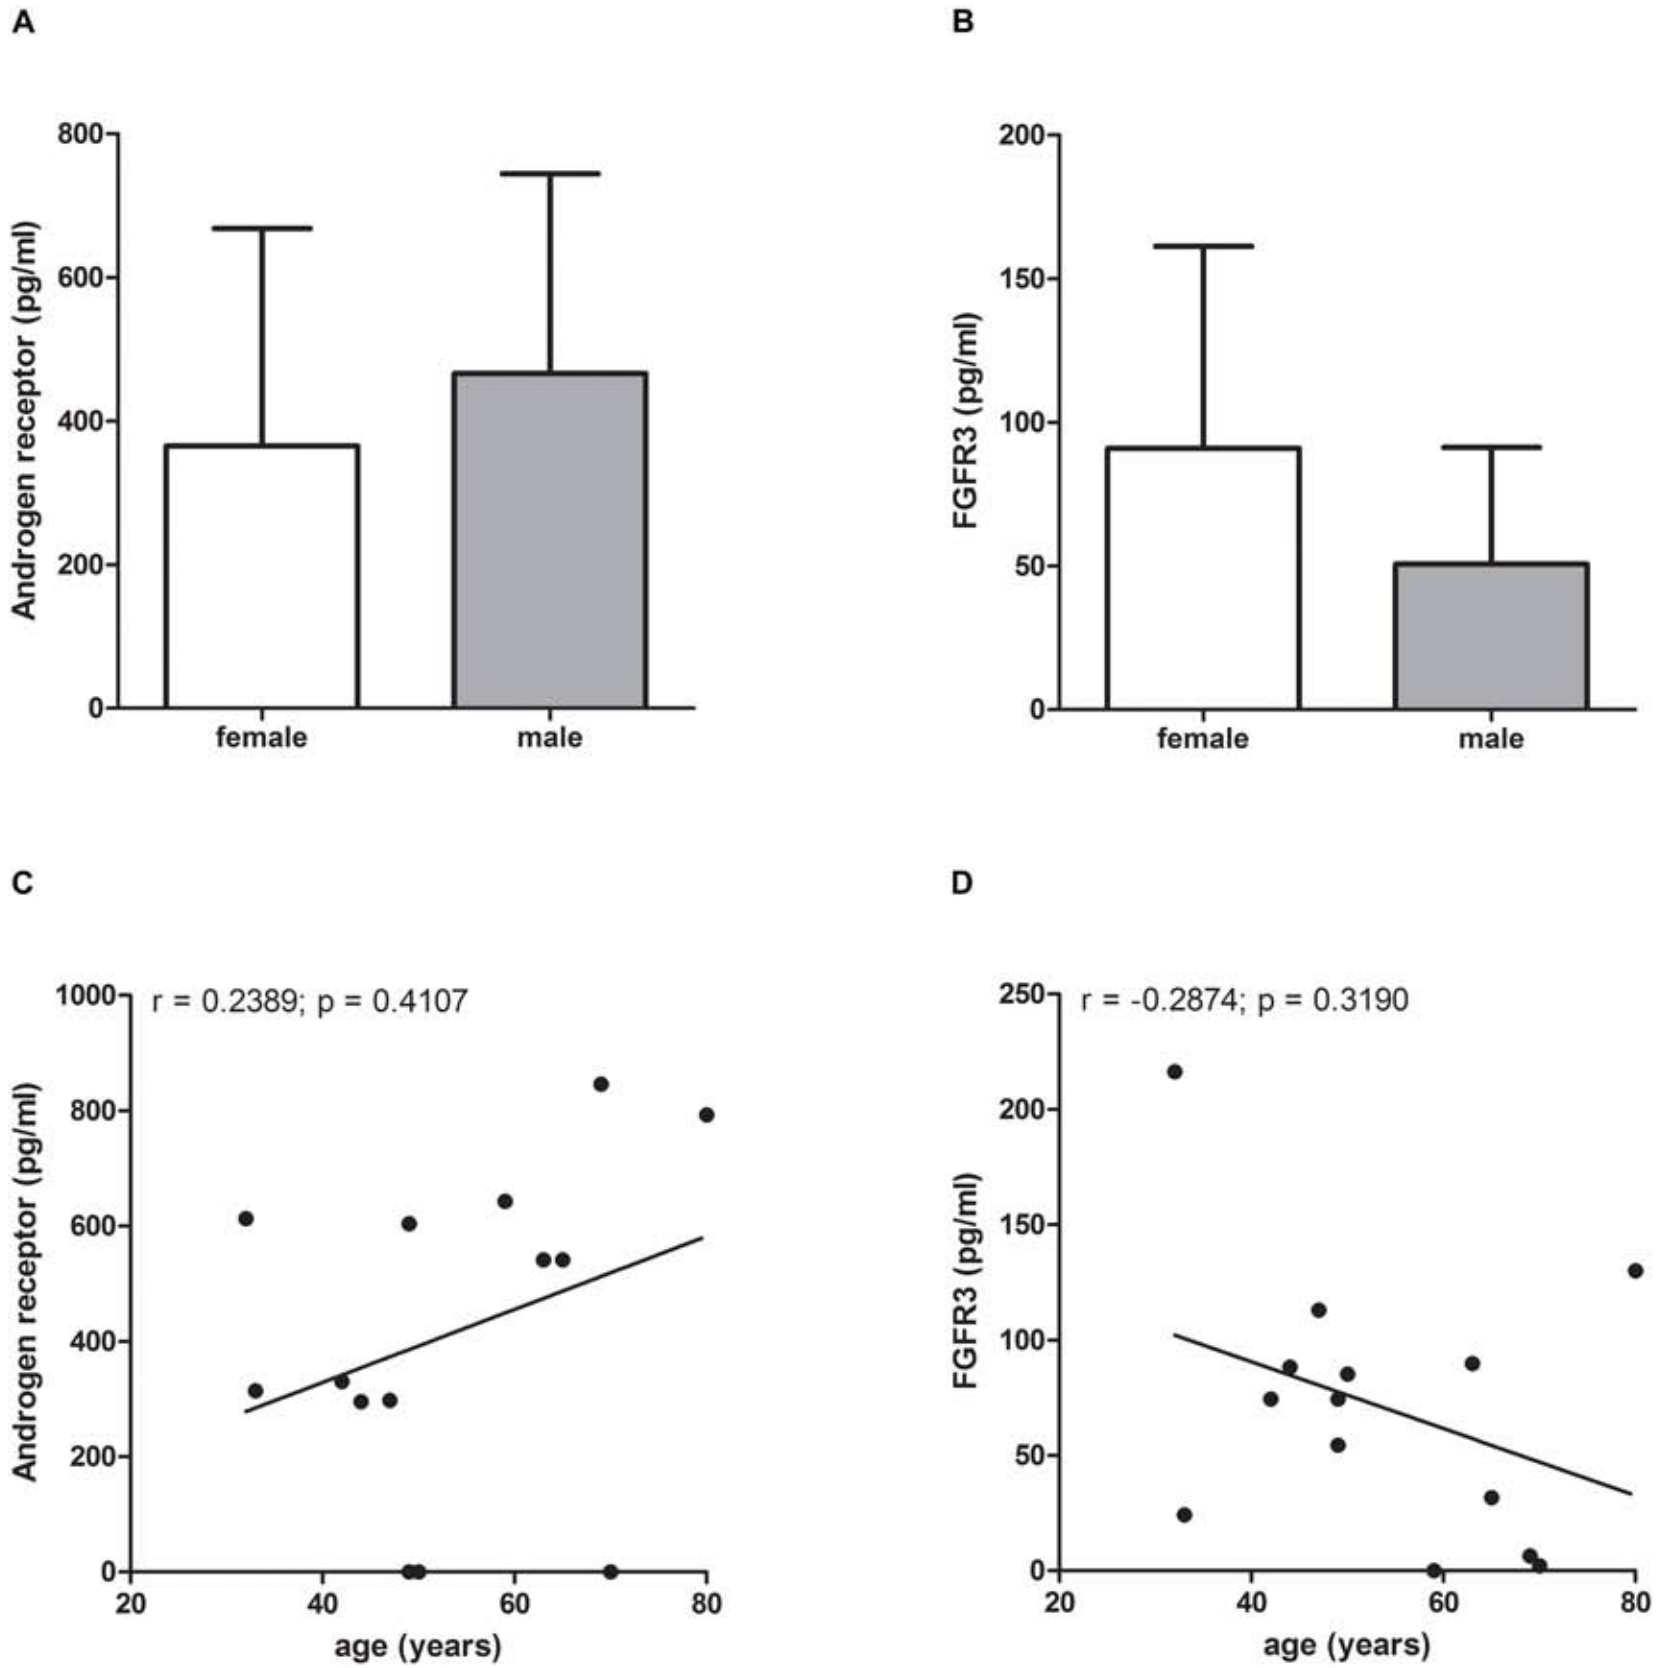

Supplement: 1741-7015-11-146-S4.pdf [file 1741-7015-11-146-S4.pdf]
